# Supplementary material
Source: PubMed Central journal article supplement (PMC5939960)
Supplement: NIHMS890121-supplement-2.pdf [file NIHMS890121-supplement-2.pdf]

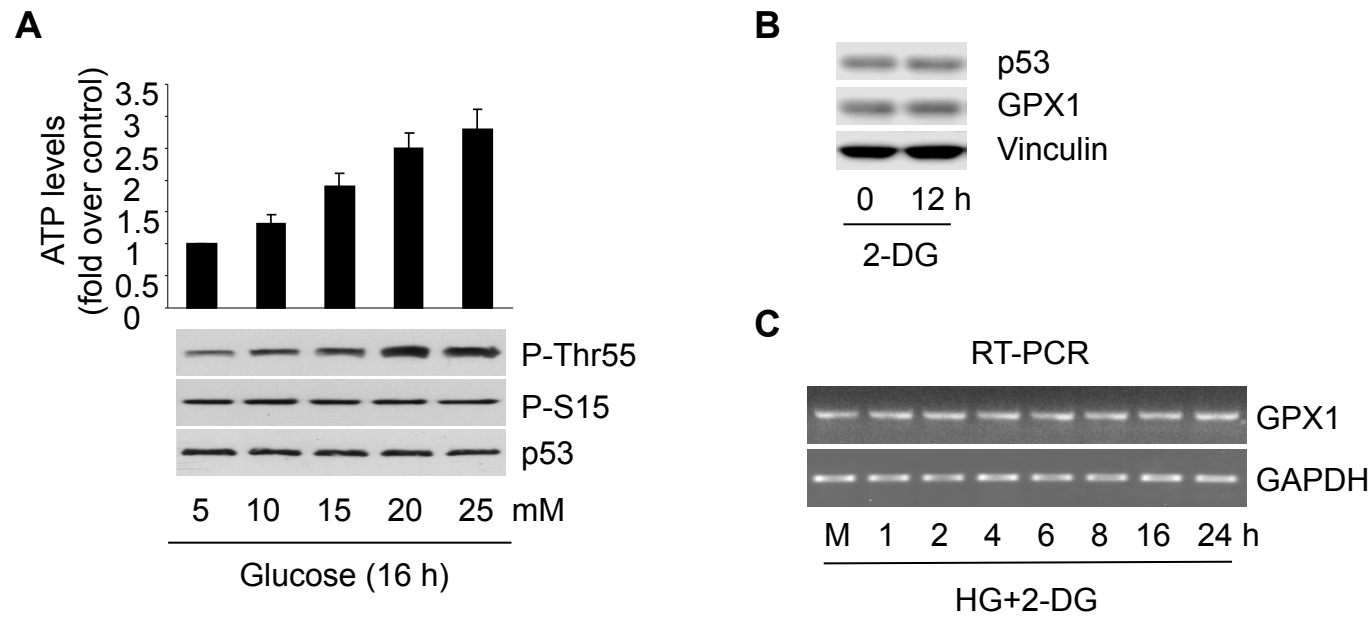

**Supplemental Figure 2.** A, HAECs were treated with various concentrations of glucose for 16 h. Ser15 or Thr55 phosphorylated p53 was detected using phospho-specific antibody. B, HAEC were treated with 2-DG for 12 h. Following the treatment, p53 and GPX1 were detected by immunoblotting. C, HAECs were treated with HG in the presence of 2-DG. Following the treatment at various times, GPX1 and GAPDH mRNA were detected by RT-PCR.
