# Supplementary material
Source: PubMed Central journal article supplement (PMC5939960)
Supplement: NIHMS890121-supplement-3.pdf [file NIHMS890121-supplement-3.pdf]

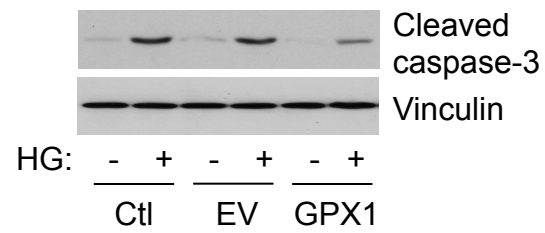

**Supplemental Figure 3.** HAECs were transfected with either empty vector (EV) or GPX-1 expression construct and treated with HG for 48 hours. Cleaved caspase-3 and vinculin were assayed by immunoblotting.
