# Supplementary material
Source: PubMed Central journal article supplement (PMC5939960)
Supplement: NIHMS890121-supplement-4.pdf [file NIHMS890121-supplement-4.pdf]

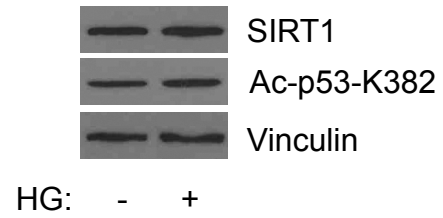

**Supplemental Figure 4.** HAEC were treated with high glucose for 16 h. Following the treatment, cells were harvested, SIRT1 and p53 acetylation were detected by immunoblotting.
